# Supplementary material for: Access to chronic medicines: patients’ preferences for a last kilometre medicine delivery service in Cape Town, South Africa
Source: Springer Nature journal article supplement (doi:10.1186/s12875-021-01392-1), 2021-02-22
Supplement: MOESM2 [file 18890512]

## Participant survey

### Criteria to proceed with survey

Do you pick up medication on a monthly/regular basis (chronic care, family planning)?

- Yes
- No

What is your age?

- Less than 18 years
- 18 to 20 years
- 21 to 30 years
- 31 to 45 years
- 46 to 60 years
- Over 60 years

If respondent answers Yes to Question 1, and are over 18 yrs old the researcher continue the survey. If not, end survey.

### Start of Survey

Name of the health care facility

Gender of Participant

- Male
- Female

Language of Participant

.....

Are you employed?

- Yes
- No
- Other.....

How many kms do you live from the clinic?

- Less than 1km
- 1 to 5 km
- More than 5 km

How often do you pick up medication?

- Once a month
- Once every 2 months
- Once every 3 months
- Other (Please explain) .....

What is the average amount of time you spend waiting to pick up medication?

- 0 to 1 hour
- 1 to 3 hours
- 4 to 6 hours
- More than 6 hours

Would you be interested in a service that picks up and delivers your medication to you?

- Yes
- No
- Other (please explain).....

Where would you like the delivery to be sent?

- Home
- Work
- Campus
- Other (please explain).....

Would you use a mobile app to order medicines if it saved you having to pay for transport?

- Yes
- No

What would you be willing to pay for the pick up and home delivery service?

R.....
